# Supplementary material for: Synthesis, Photoswitching Behavior and Nonlinear Optical Properties of Substituted Tribenzo[a,d,g]coronene
Source: MDPI journal article supplement (doi:10.3390/molecules28031419), 2023-02-02
Supplement: s1 [file s1]

# Synthesis, Photoswitching Behavior and Nonlinear Optical Properties of Substituted Tribenzo[a,d,g]coronene

Xueqing Li<sup>1,†</sup>, Jie Zhao<sup>2,†</sup>, Wei Wang<sup>1</sup>, Yiming Li<sup>1</sup>, Yunfei Li<sup>2,\*</sup>, Shuyun Zhou<sup>2</sup> and Jinchong Xiao<sup>1,\*</sup>

<sup>1</sup> Key Laboratory of Chemical Biology of Hebei Province, College of Chemistry and Environmental Science, Hebei University, Baoding 071002, P. R. China. E-mail: jcxiaoicas@163.com

<sup>2</sup> Key Laboratory of Photochemical Conversion and Optoelectronic Materials, Technical Institute of Physics and Chemistry, Chinese Academy of Sciences, Beijing 100190, P. R. China. E-mail: liyunfei@mail.ipc.ac.cn

## Contents

|                         |     |
|-------------------------|-----|
| Figure S1-S3            | S2  |
| Figure S4-S6            | S3  |
| Figure S7-S9            | S4  |
| Figure S10-S12          | S5  |
| Figure S13-S15          | S6  |
| Figure S16-S18          | S7  |
| Table S1                | S8  |
| Figure S19 and Table S2 | S9  |
| Table S3                | S18 |
| Figure S20 and S21      | S19 |

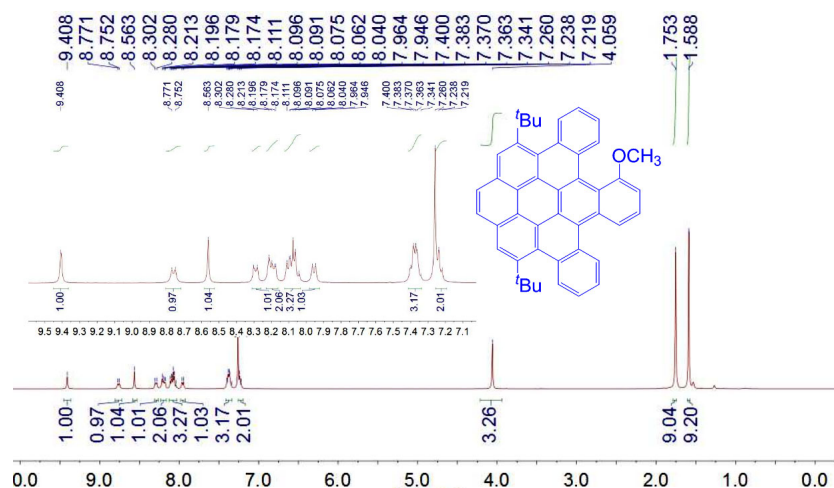

Figure S1  $^1\text{H}$  NMR spectrum of **3a**.

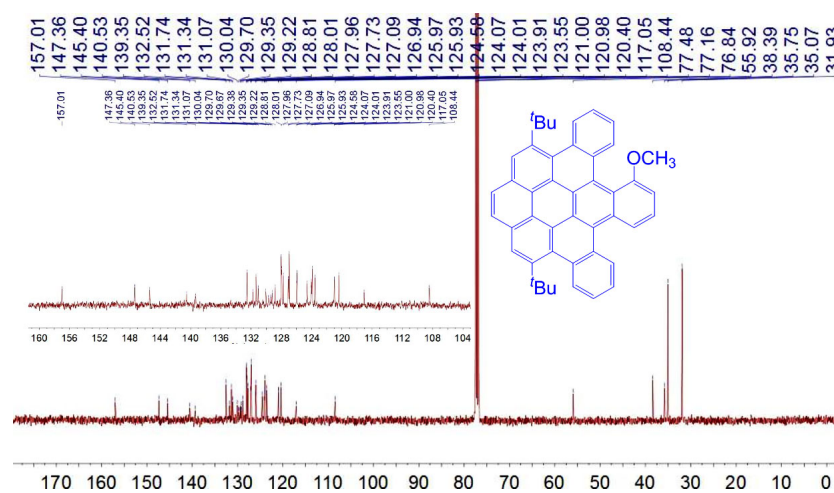

Figure S2  $^{13}\text{C}$  NMR spectrum of **3a**.

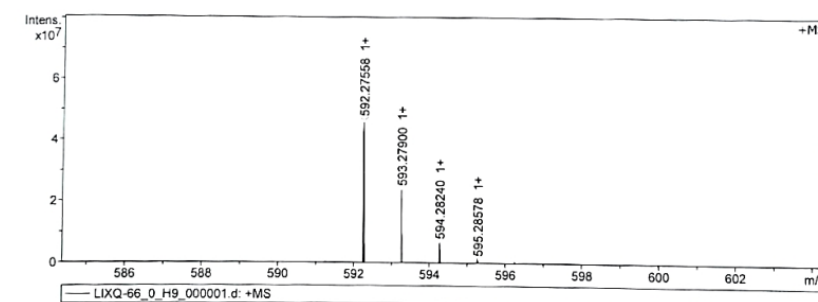

| Meas. $m/z$ | # | Ion Formula                       | Score  | $m/z$      | err [ppm] | Mean err [ppm] | mSigma | rdB  | e <sup>-</sup> Conf | N-Rule |
|-------------|---|-----------------------------------|--------|------------|-----------|----------------|--------|------|---------------------|--------|
| 592.275577  | 1 | C <sub>45</sub> H <sub>36</sub> O | 100.00 | 592.276057 | 0.8       |                | 14.1   | 28.0 | odd                 | ok     |

Figure S3 HR-MS spectrum of **3a**.

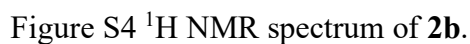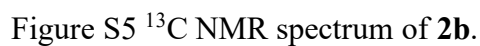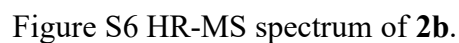

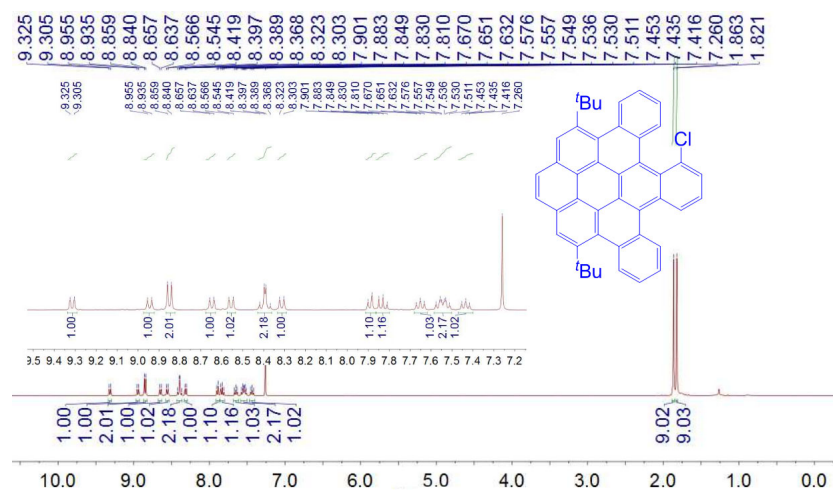

Figure S7  $^1\text{H}$  NMR spectrum of **3b**.

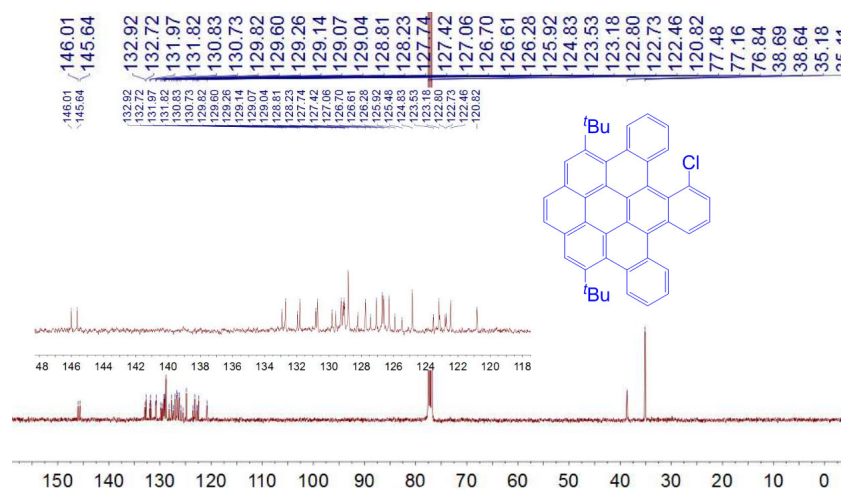

Figure S8  $^{13}\text{C}$  NMR spectrum of **3b**.

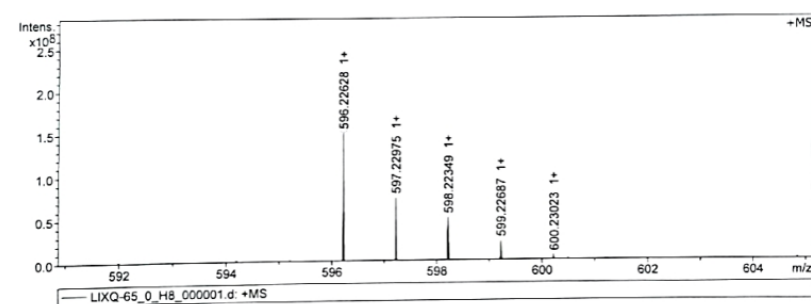

| Meas. m/z  | # | Ion Formula                        | Score  | m/z        | err [ppm] | Mean err [ppm] | mSigma | rdb  | e <sup>-</sup> Conf | N-Rule |
|------------|---|------------------------------------|--------|------------|-----------|----------------|--------|------|---------------------|--------|
| 596.226278 | 1 | C <sub>44</sub> H <sub>33</sub> Cl | 100.00 | 596.226530 | -0.4      | 0.5            | 166.6  | 28.0 | odd                 | ok     |

Figure S9 HR-MS spectrum of **3b**.

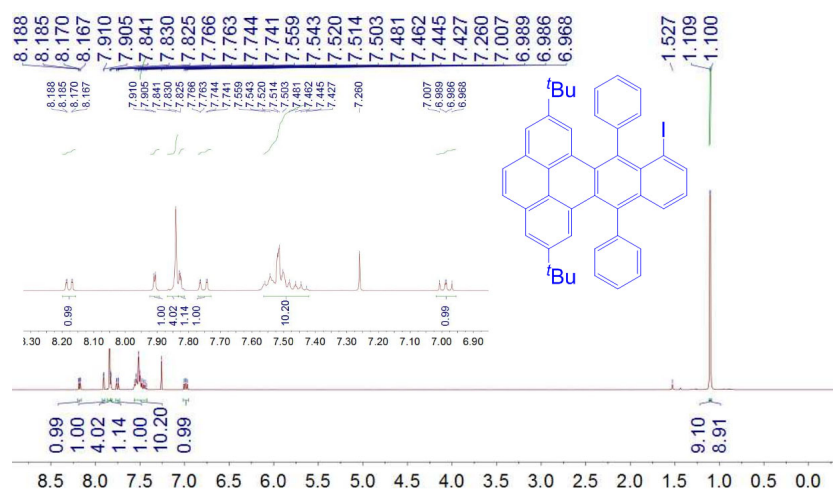

Figure S10 <sup>1</sup>H NMR spectrum of **2d**.

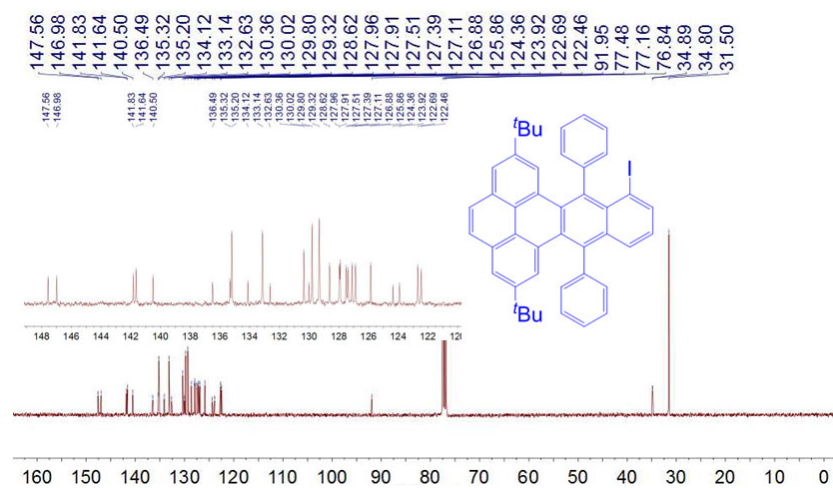

Figure S11 <sup>13</sup>C NMR spectrum of **2d**.

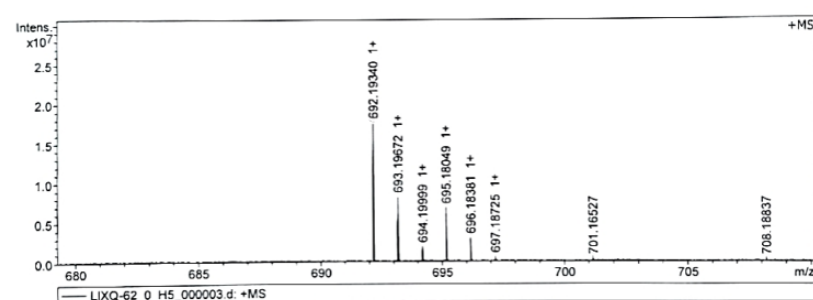

| Meas. m/z  | # | Ion Formula                       | Score  | m/z        | err [ppm] | Mean err [ppm] | mSigma | rdb | e <sup>-</sup> | Conf | N-Rule |
|------------|---|-----------------------------------|--------|------------|-----------|----------------|--------|-----|----------------|------|--------|
| 692.193396 | 1 | C <sub>44</sub> H <sub>37</sub> I | 100.00 | 692.193451 | -0.1      |                | 0.1    | 7.7 | 26.0           | odd  | ok     |

Figure S12 HR-MS spectrum of **2d**.

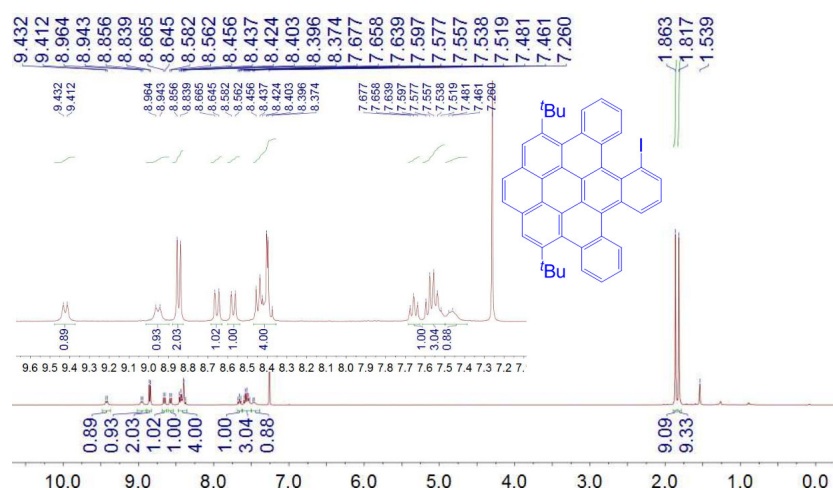

Figure S13  $^1\text{H}$  NMR spectrum of **3d**.

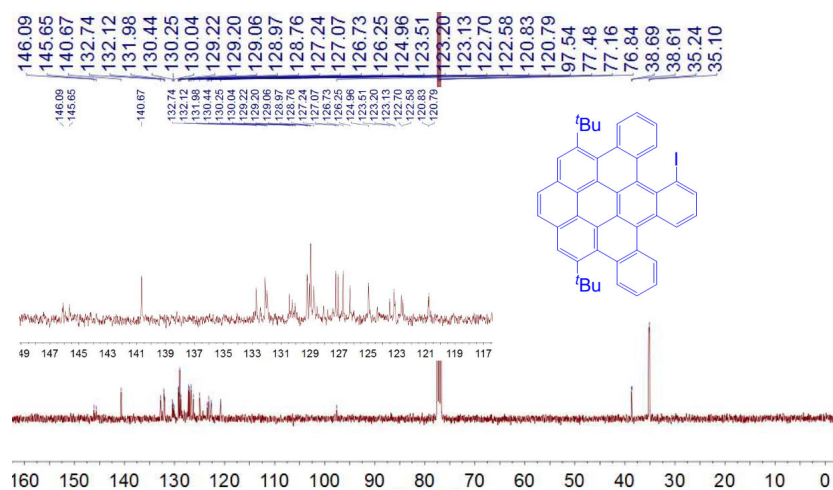

Figure S14  $^{13}\text{C}$  NMR spectrum of **3d**.

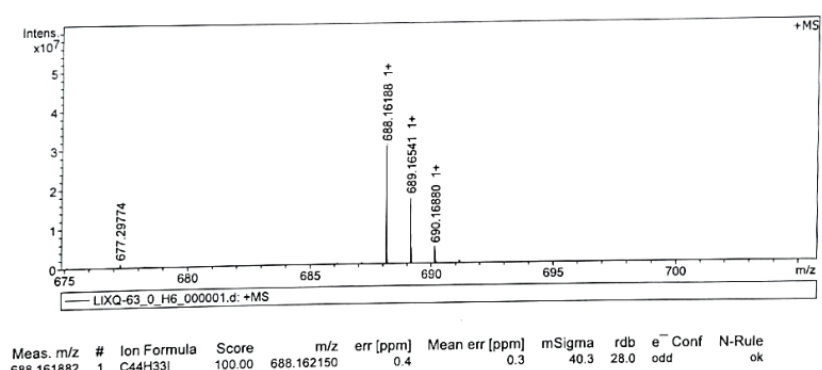

Figure S15 HR-MS spectrum of **3d**.



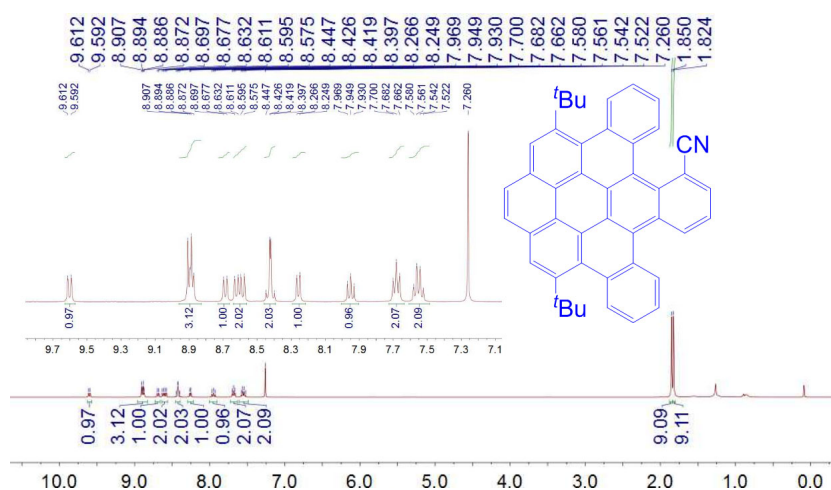

Figure S16 <sup>1</sup>H NMR spectrum of **3e**.

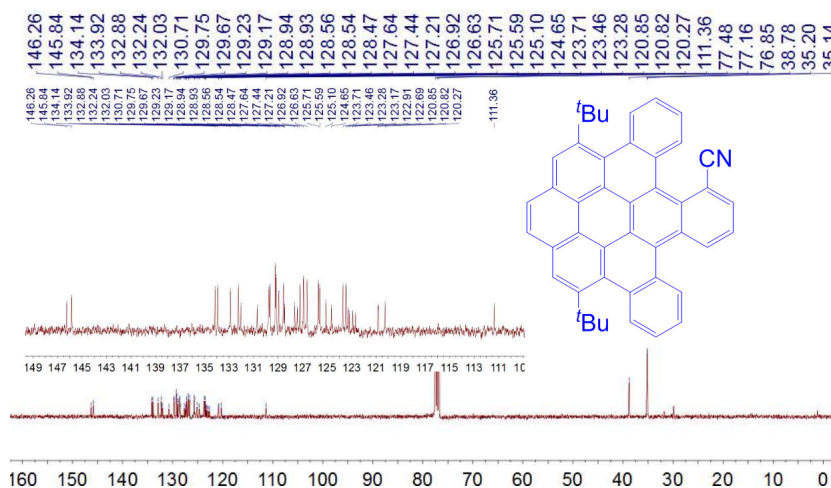

Figure S17 <sup>13</sup>C NMR spectrum of **3e**.

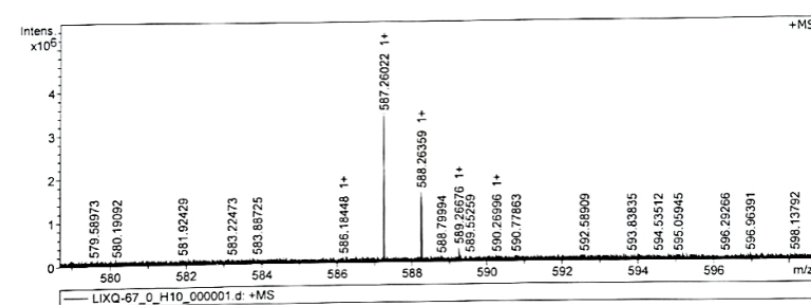

| Meas. <i>m/z</i> | # | Ion Formula                       | Score  | <i>m/z</i> | err [ppm] | Mean err [ppm] | mSigma | rdb  | e <sup>-</sup> Conf | N-Rule |
|------------------|---|-----------------------------------|--------|------------|-----------|----------------|--------|------|---------------------|--------|
| 587.260217       | 1 | C <sub>45</sub> H <sub>33</sub> N | 100.00 | 587.260751 | 0.9       | 0.9            | 18.8   | 30.0 | odd                 | ok     |

Figure S18 HR-MS spectrum of **3e**.

Table S1 Crystal data and structure refinement for **3b**.

|                                         |                                                                                                                                     |
|-----------------------------------------|-------------------------------------------------------------------------------------------------------------------------------------|
|                                         | <b>3b</b>                                                                                                                           |
| Empirical formula                       | C <sub>44</sub> H <sub>33</sub> Cl                                                                                                  |
| Formula weight                          | 596.23                                                                                                                              |
| Temperature/K                           | 298(2)                                                                                                                              |
| Crystal system                          | Monoclinic                                                                                                                          |
| Space group                             | C2/c                                                                                                                                |
| Unit cell dimensions                    | a = 26.684(3) Å<br>b = 13.5714(13) Å<br>c = 19.003(2) Å<br>$\alpha = 90^\circ$<br>$\beta = 100.020(4)^\circ$<br>$\gamma = 90^\circ$ |
| Volume/Å <sup>3</sup>                   | 6776.8(12)                                                                                                                          |
| Z                                       | 8                                                                                                                                   |
| Density/(g/cm <sup>3</sup> )            | 1.171                                                                                                                               |
| Absorption Coefficient/mm <sup>-1</sup> | 0.142                                                                                                                               |
| F(000)                                  | 2512                                                                                                                                |
| Crystal size/mm <sup>3</sup>            | 0.28×0.17×0.06                                                                                                                      |
| Radiation type                          | Mo K $\alpha$<br>$\lambda = 0.71073$                                                                                                |
| CCDC number                             | 2232268                                                                                                                             |



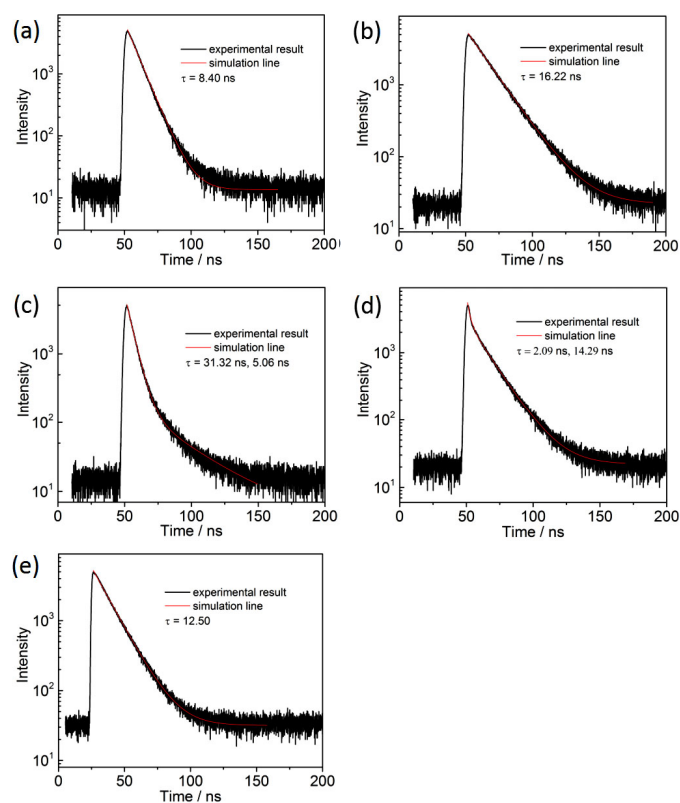

Figure S19 Fluorescence decay of (a) **3a**, (b) **3b**, (c) **3c**, (d) **3d**, (e) **3e** in degassed dichloromethane. The excitation wavelength is 455 nm.

Table S2 Cartesian coordinates of optimized **3a-3e**

**3a**

|   |             |             |             |
|---|-------------|-------------|-------------|
| C | 2.14051480  | -3.62098387 | -0.52025083 |
| C | 0.75291323  | -3.47749718 | -0.28408566 |
| C | 0.23880125  | -2.16546463 | -0.12580457 |
| C | 1.13810793  | -1.07246096 | 0.00622341  |
| C | 2.54140733  | -1.30482188 | 0.03253380  |
| C | 3.04550925  | -2.56793129 | -0.45980910 |
| C | -0.15434734 | -4.58481356 | -0.27891350 |
| C | -1.50038032 | -4.39140946 | -0.10722000 |
| C | -2.04370718 | -3.07276644 | 0.01779468  |
| C | -1.17036317 | -1.95798215 | -0.04801790 |
| C | -3.40713488 | -2.82805865 | 0.30601745  |
| C | -3.96062177 | -1.55711296 | 0.39707589  |
| C | -3.12304640 | -0.45335208 | -0.02404892 |
| C | -1.71388119 | -0.64344258 | -0.06399647 |
| C | -0.81189939 | 0.49067158  | -0.08697745 |
| C | 0.60487544  | 0.27219918  | 0.08452724  |
| C | -1.32361591 | 1.79935586  | -0.18450090 |
| C | -0.43778418 | 2.92395915  | 0.02845763  |

|   |             |             |             |
|---|-------------|-------------|-------------|
| C | 0.97726046  | 2.70236887  | 0.07719103  |
| C | 1.47960304  | 1.36237032  | 0.26533487  |
| C | -0.91917772 | 4.25260538  | 0.22243871  |
| C | -0.05489402 | 5.32496783  | 0.25209384  |
| C | 1.32114268  | 5.13883682  | 0.00535346  |
| C | 1.82817805  | 3.85208477  | -0.11158391 |
| C | 2.78320705  | 1.04588825  | 0.84838197  |
| C | -2.69937622 | 1.93302273  | -0.66493937 |
| C | 3.44337412  | 1.95244713  | 1.71701838  |
| C | 4.58717436  | 1.60140882  | 2.41232112  |
| C | 5.10885765  | 0.30227798  | 2.28576454  |
| C | 4.46729179  | -0.61241526 | 1.46897073  |
| C | 3.31214242  | -0.27351500 | 0.72136008  |
| C | -3.58887365 | 0.81539313  | -0.57516008 |
| C | -4.84080816 | 0.89487262  | -1.23251525 |
| C | -5.25031735 | 2.02992388  | -1.91093577 |
| C | -4.38490132 | 3.13205903  | -1.99178861 |
| C | -3.13524202 | 3.06951912  | -1.39753319 |
| C | -5.35155243 | -1.45229179 | 1.10842658  |
| C | -5.28949207 | -2.32630735 | 2.39416969  |
| C | -6.49457449 | -2.00392391 | 0.22589314  |
| C | -5.70283849 | -0.03455810 | 1.61194844  |
| O | 3.11196463  | 3.59261718  | -0.45718929 |
| C | 4.02412456  | 4.65267603  | -0.62371115 |
| C | 4.45625720  | -2.81889454 | -1.08851715 |
| C | 4.24461292  | -3.52748068 | -2.45676930 |
| C | 5.32107944  | -3.75046998 | -0.20883090 |
| C | 5.23737178  | -1.52906677 | -1.42370031 |
| H | 2.48878175  | -4.61378989 | -0.81137234 |
| H | 0.24844209  | -5.59421337 | -0.39973227 |
| H | -2.18152882 | -5.24589351 | -0.06763047 |
| H | -4.02528135 | -3.69992320 | 0.52880735  |
| H | -1.98299660 | 4.41706172  | 0.38012873  |
| H | -0.43843710 | 6.33349585  | 0.42536012  |
| H | 1.97229241  | 6.00590740  | -0.10002773 |
| H | 3.00168498  | 2.93140988  | 1.89637800  |
| H | 5.05223415  | 2.31858611  | 3.09361719  |
| H | 5.98479773  | -0.00177925 | 2.86439678  |
| H | 4.81835866  | -1.64178931 | 1.44963734  |
| H | -5.47255082 | 0.01023253  | -1.25623955 |
| H | -6.21787998 | 2.04459014  | -2.41882372 |
| H | -4.66889379 | 4.01787213  | -2.56551435 |
| H | -2.44528151 | 3.89422268  | -1.56001961 |
| H | -4.46462711 | -2.00719640 | 3.04999359  |

|           |             |             |             |
|-----------|-------------|-------------|-------------|
| H         | -6.23114582 | -2.22170422 | 2.95620835  |
| H         | -5.15565111 | -3.39571768 | 2.18119532  |
| H         | -6.64960141 | -1.41016939 | -0.68698383 |
| H         | -7.44418560 | -2.00100855 | 0.78601650  |
| H         | -6.29362811 | -3.04073028 | -0.08630756 |
| H         | -4.87040784 | 0.40154546  | 2.18581011  |
| H         | -5.96256847 | 0.66950407  | 0.81512893  |
| H         | -6.57245859 | -0.10055732 | 2.28483423  |
| H         | 4.98839362  | 4.19445042  | -0.88041137 |
| H         | 3.71801196  | 5.33106184  | -1.44027733 |
| H         | 4.14299092  | 5.24377317  | 0.30248190  |
| H         | 3.59790203  | -2.92845191 | -3.11654731 |
| H         | 5.21607506  | -3.65842461 | -2.95951388 |
| H         | 3.79425248  | -4.52483761 | -2.35918862 |
| H         | 5.56905841  | -3.30242266 | 0.76466201  |
| H         | 6.27199233  | -3.98066650 | -0.71718769 |
| H         | 4.80793396  | -4.70462519 | -0.01158441 |
| H         | 4.61222217  | -0.81949331 | -1.98765360 |
| H         | 5.62456137  | -1.00478562 | -0.54425118 |
| H         | 6.10155841  | -1.78779538 | -2.05599389 |
| <b>3b</b> |             |             |             |
| C         | 2.26411095  | -3.52750841 | -0.52276142 |
| C         | 0.87032527  | -3.42675268 | -0.30015441 |
| C         | 0.31583453  | -2.13188007 | -0.13851105 |
| C         | 1.18134517  | -1.01364345 | 0.00585268  |
| C         | 2.59070618  | -1.20426931 | 0.04591450  |
| C         | 3.13751559  | -2.44911116 | -0.44676130 |
| C         | -0.00308487 | -4.56083360 | -0.31008461 |
| C         | -1.35541750 | -4.40918236 | -0.14616677 |
| C         | -1.93847073 | -3.10844525 | -0.01326570 |
| C         | -1.09925357 | -1.96742420 | -0.06705805 |
| C         | -3.30922954 | -2.90776789 | 0.27464668  |
| C         | -3.90105858 | -1.65546423 | 0.38037700  |
| C         | -3.09694148 | -0.52208289 | -0.02784588 |
| C         | -1.68269140 | -0.66996752 | -0.07184679 |
| C         | -0.81532084 | 0.49039267  | -0.08501587 |
| C         | 0.60812514  | 0.31415419  | 0.08296585  |
| C         | -1.36533286 | 1.78388788  | -0.16382411 |
| C         | -0.50967669 | 2.93158235  | 0.05347923  |
| C         | 0.91727821  | 2.75492431  | 0.06929376  |
| C         | 1.45208413  | 1.42734160  | 0.26587335  |
| C         | -1.03044928 | 4.23785642  | 0.27833869  |
| C         | -0.21242121 | 5.34882685  | 0.29156150  |
| C         | 1.15470878  | 5.20762080  | -0.01500663 |

|    |             |             |             |
|----|-------------|-------------|-------------|
| C  | 1.69821265  | 3.94200343  | -0.13597375 |
| C  | 2.75611238  | 1.15105769  | 0.86394402  |
| C  | -2.74673742 | 1.88568944  | -0.63406550 |
| Cl | 3.35126921  | 3.85984479  | -0.72634008 |
| C  | 3.37800266  | 2.07940575  | 1.73692501  |
| C  | 4.51959122  | 1.76056848  | 2.45132957  |
| C  | 5.07523901  | 0.47488361  | 2.33943012  |
| C  | 4.47326013  | -0.46009334 | 1.51460548  |
| C  | 3.32260358  | -0.15415200 | 0.74741205  |
| C  | -3.60165563 | 0.74005161  | -0.55926955 |
| C  | -4.85785127 | 0.79254962  | -1.21110508 |
| C  | -5.30465362 | 1.92617454  | -1.86782959 |
| C  | -4.47408286 | 3.05587952  | -1.93248853 |
| C  | -3.22029038 | 3.02112197  | -1.34505471 |
| C  | -5.29463767 | -1.60210062 | 1.09245329  |
| C  | -5.20806772 | -2.49352362 | 2.36497380  |
| C  | -6.42077030 | -2.17366603 | 0.20091760  |
| C  | -5.68675462 | -0.20313933 | 1.61802465  |
| C  | 4.56253220  | -2.65471053 | -1.05797081 |
| C  | 4.38921621  | -3.35572673 | -2.43522354 |
| C  | 5.43945565  | -3.56956817 | -0.17289814 |
| C  | 5.31263678  | -1.34077074 | -1.36966023 |
| H  | 2.64497306  | -4.50818907 | -0.81423772 |
| H  | 0.43071071  | -5.55670619 | -0.43533103 |
| H  | -2.01078826 | -5.28392499 | -0.11726579 |
| H  | -3.90058375 | -3.80037536 | 0.48722410  |
| H  | -2.09624270 | 4.35676460  | 0.46435850  |
| H  | -0.62873860 | 6.34062894  | 0.48235366  |
| H  | 1.79100484  | 6.07998687  | -0.17112650 |
| H  | 2.91519800  | 3.05241293  | 1.89575758  |
| H  | 4.95821485  | 2.49485059  | 3.13146947  |
| H  | 5.94959924  | 0.19651920  | 2.93308838  |
| H  | 4.85389391  | -1.47924231 | 1.50358073  |
| H  | -5.46229742 | -0.11040389 | -1.24754488 |
| H  | -6.27402992 | 1.91991208  | -2.37230345 |
| H  | -4.78745333 | 3.94210447  | -2.48990698 |
| H  | -2.55659989 | 3.86872126  | -1.49962332 |
| H  | -4.39253059 | -2.16164436 | 3.02609562  |
| H  | -6.15231381 | -2.42388375 | 2.92795233  |
| H  | -5.04493780 | -3.55548795 | 2.13595124  |
| H  | -6.59191601 | -1.57276204 | -0.70435997 |
| H  | -7.37049407 | -2.20500152 | 0.75988063  |
| H  | -6.19044601 | -3.20021353 | -0.12464963 |
| H  | -4.86701523 | 0.24812898  | 2.19844654  |

|           |             |             |             |
|-----------|-------------|-------------|-------------|
| H         | -5.96876233 | 0.50591984  | 0.83321457  |
| H         | -6.55324210 | -0.30509847 | 2.29030816  |
| H         | 3.73807249  | -2.76657541 | -3.09953454 |
| H         | 5.37130614  | -3.45674589 | -2.92379487 |
| H         | 3.96263167  | -4.36514159 | -2.35399595 |
| H         | 5.65435019  | -3.12516177 | 0.81009741  |
| H         | 6.40653612  | -3.76330330 | -0.66551222 |
| H         | 4.95346135  | -4.54186420 | 0.00371511  |
| H         | 4.67681481  | -0.64175766 | -1.93485060 |
| H         | 5.67392678  | -0.81560529 | -0.47991323 |
| H         | 6.19184298  | -1.56935451 | -1.99262258 |
| <b>3c</b> |             |             |             |
| C         | -1.50893708 | 3.99192094  | -0.53195005 |
| C         | -0.14150390 | 3.69302876  | -0.32616853 |
| C         | 0.22053085  | 2.33490836  | -0.13950229 |
| C         | -0.79690432 | 1.35911115  | 0.04397640  |
| C         | -2.16321316 | 1.75455823  | 0.09601647  |
| C         | -2.52964827 | 3.05568436  | -0.41817428 |
| C         | 0.88788816  | 4.68637349  | -0.37952282 |
| C         | 2.20659394  | 4.34187696  | -0.23539972 |
| C         | 2.59592197  | 2.97316613  | -0.07850416 |
| C         | 1.59778797  | 1.96675012  | -0.08696155 |
| C         | 3.92870311  | 2.58080240  | 0.18968935  |
| C         | 4.33360170  | 1.25821211  | 0.31821295  |
| C         | 3.36325651  | 0.24582917  | -0.04345043 |
| C         | 1.98509588  | 0.59823985  | -0.06635465 |
| C         | 0.95755149  | -0.42223980 | -0.03283719 |
| C         | -0.42212086 | -0.03611038 | 0.14668118  |
| C         | 1.31176522  | -1.78386716 | -0.07734084 |
| C         | 0.30151711  | -2.78699407 | 0.18562425  |
| C         | -1.08547974 | -2.40654950 | 0.20027945  |
| C         | -1.41644946 | -1.01003278 | 0.36577798  |
| C         | 0.63157253  | -4.14496533 | 0.45896194  |
| C         | -0.33744709 | -5.12481073 | 0.51854544  |
| C         | -1.67158545 | -4.80068699 | 0.20070423  |
| C         | -2.02897137 | -3.47589782 | 0.03169578  |
| C         | -2.65679383 | -0.53318246 | 0.97151704  |
| C         | 2.65373266  | -2.10165899 | -0.56469176 |
| Br        | -3.78763267 | -3.17572417 | -0.67621128 |
| C         | -3.39376317 | -1.34270441 | 1.87254396  |
| C         | -4.46879661 | -0.84741710 | 2.58982787  |
| C         | -4.83662479 | 0.50129510  | 2.45028992  |
| C         | -4.11731544 | 1.32123380  | 1.59728159  |
| C         | -3.03080176 | 0.83716421  | 0.82852117  |

|   |             |             |             |
|---|-------------|-------------|-------------|
| C | 3.66630769  | -1.09030853 | -0.54557804 |
| C | 4.88457123  | -1.34253114 | -1.22215082 |
| C | 5.14713141  | -2.54860944 | -1.84873219 |
| C | 4.16295698  | -3.54951651 | -1.85440020 |
| C | 2.94231231  | -3.31651605 | -1.24281281 |
| C | 5.71921996  | 1.01731407  | 1.00663375  |
| C | 5.78911475  | 1.94044128  | 2.25699267  |
| C | 6.89832647  | 1.39701205  | 0.08148258  |
| C | 5.91577761  | -0.41185786 | 1.55999287  |
| C | -3.91966250 | 3.45825122  | -1.01209048 |
| C | -3.66988639 | 4.11517765  | -2.39968247 |
| C | -4.64282891 | 4.49952464  | -0.12700763 |
| C | -4.85548444 | 2.26326949  | -1.30061233 |
| H | -1.74717646 | 5.01102155  | -0.84207400 |
| H | 0.60189023  | 5.73186693  | -0.52345559 |
| H | 2.98336529  | 5.11136822  | -0.24127022 |
| H | 4.64776904  | 3.38256885  | 0.36785188  |
| H | 1.67128724  | -4.40795987 | 0.64580972  |
| H | -0.06780201 | -6.15813624 | 0.74884827  |
| H | -2.41870070 | -5.58493568 | 0.07008960  |
| H | -3.07245056 | -2.36844692 | 2.04865995  |
| H | -4.99948675 | -1.49570274 | 3.29133507  |
| H | -5.65521370 | 0.91586292  | 3.04393892  |
| H | -4.34908221 | 2.38335544  | 1.56335885  |
| H | 5.61012050  | -0.53677264 | -1.30278356 |
| H | 6.09338717  | -2.69755225 | -2.37470638 |
| H | 4.33248038  | -4.48923020 | -2.38590720 |
| H | 2.16062183  | -4.06463702 | -1.35305011 |
| H | 4.94776701  | 1.74499932  | 2.93979076  |
| H | 6.72449640  | 1.74789612  | 2.80611972  |
| H | 5.77653388  | 3.00938973  | 2.00405923  |
| H | 6.96523881  | 0.75284339  | -0.80766930 |
| H | 7.85318644  | 1.30662209  | 0.62509740  |
| H | 6.81168084  | 2.43669180  | -0.27091539 |
| H | 5.04874655  | -0.73006944 | 2.15951302  |
| H | 6.08280432  | -1.16932360 | 0.78760546  |
| H | 6.79763266  | -0.42026654 | 2.21990947  |
| H | -3.11823682 | 3.43451487  | -3.06662311 |
| H | -4.63513113 | 4.34967094  | -2.87581814 |
| H | -3.10532247 | 5.05531639  | -2.33520446 |
| H | -4.91318291 | 4.09987507  | 0.86149152  |
| H | -5.57463265 | 4.83142625  | -0.61383394 |
| H | -4.01550525 | 5.38969579  | 0.03728068  |
| H | -4.33538001 | 1.47725739  | -1.86988711 |

|           |             |             |             |
|-----------|-------------|-------------|-------------|
| H         | -5.27468686 | 1.79954064  | -0.40196943 |
| H         | -5.70198842 | 2.61346459  | -1.91213817 |
| <b>3d</b> |             |             |             |
| C         | -0.75912913 | 4.27333114  | -0.56197357 |
| C         | 0.56426649  | 3.80544259  | -0.38547586 |
| C         | 0.75458792  | 2.41734743  | -0.16844625 |
| C         | -0.37377679 | 1.58561102  | 0.06739608  |
| C         | -1.67600461 | 2.15475388  | 0.14483885  |
| C         | -1.88806377 | 3.48025076  | -0.39292275 |
| C         | 2.07447399  | 1.87690151  | -0.13325652 |
| C         | 2.28500718  | 0.47113779  | -0.07865758 |
| C         | 1.13647274  | -0.40780080 | 0.00156280  |
| C         | -0.17727128 | 0.15684270  | 0.19848168  |
| C         | 1.71051205  | 4.65640856  | -0.49206216 |
| C         | 2.97755170  | 4.14963778  | -0.36465391 |
| C         | 3.19258597  | 2.74725707  | -0.17282050 |
| C         | 4.46956240  | 2.19545006  | 0.08572882  |
| C         | 4.70466684  | 0.83630981  | 0.25052737  |
| C         | 3.60701674  | -0.05422180 | -0.06516571 |
| C         | -3.23343111 | 4.04746477  | -0.95449819 |
| C         | -2.94980484 | 4.62459376  | -2.37060141 |
| C         | -4.33066133 | 2.98197052  | -1.17215106 |
| C         | -3.77679610 | 5.19978105  | -0.07912760 |
| C         | 6.06135465  | 0.44172030  | 0.92535115  |
| C         | 6.27355800  | 1.38627644  | 2.14368301  |
| C         | 6.08315971  | -0.98239418 | 1.52426879  |
| C         | 7.26075176  | 0.63855646  | -0.02967880 |
| C         | 1.31179348  | -1.80439116 | -0.01004241 |
| C         | 0.18644115  | -2.66181578 | 0.29740628  |
| C         | -1.14072383 | -2.10660401 | 0.32311697  |
| C         | -1.28254090 | -0.67612162 | 0.46232307  |
| C         | 0.34430619  | -4.04153765 | 0.61302752  |
| C         | -0.74125224 | -4.88435169 | 0.72406853  |
| C         | -2.02893554 | -4.40196700 | 0.40886359  |
| C         | -2.21842207 | -3.04827553 | 0.19968998  |
| C         | -2.43410426 | -0.03177218 | 1.08749046  |
| C         | 2.59373560  | -2.30552147 | -0.50420221 |
| C         | -3.24174262 | -0.72249082 | 2.02639055  |
| C         | -4.21660359 | -0.07658745 | 2.76711928  |
| C         | -4.40731912 | 1.30631941  | 2.61106346  |
| C         | -3.61694922 | 2.00956587  | 1.71722320  |
| C         | -2.63083613 | 1.37306224  | 0.92497977  |
| C         | 3.72827867  | -1.43306264 | -0.52780105 |
| C         | 4.89406968  | -1.86175924 | -1.20788604 |



|           |             |             |             |
|-----------|-------------|-------------|-------------|
| C         | 4.99036728  | -3.11041612 | -1.79755876 |
| C         | 3.88533873  | -3.97525344 | -1.76169208 |
| C         | 2.71346318  | -3.56736893 | -1.14634404 |
| I         | -4.11673876 | -2.52689906 | -0.65515085 |
| H         | -0.87376458 | 5.30724278  | -0.89301683 |
| H         | 1.55683154  | 5.72567508  | -0.66125852 |
| H         | 3.84574763  | 4.81281473  | -0.40945311 |
| H         | 5.28918520  | 2.90243835  | 0.22770333  |
| H         | -3.89142990 | 4.97819657  | -2.81976546 |
| H         | -2.25711392 | 5.47718995  | -2.35789317 |
| H         | -2.52539230 | 3.85455153  | -3.03342983 |
| H         | -5.14216341 | 3.42307519  | -1.77249866 |
| H         | -4.77911668 | 2.61009221  | -0.24537263 |
| H         | -3.94068612 | 2.11431347  | -1.72651547 |
| H         | -4.05295593 | 4.86690668  | 0.93215953  |
| H         | -3.03316829 | 6.00462309  | 0.03085748  |
| H         | -4.67788188 | 5.63726390  | -0.53982972 |
| H         | 7.18753427  | 1.09216321  | 2.68380879  |
| H         | 6.39285477  | 2.43994097  | 1.85645624  |
| H         | 5.42825910  | 1.32227802  | 2.84643867  |
| H         | 6.96912943  | -1.08411571 | 2.17075887  |
| H         | 6.13602976  | -1.77985486 | 0.77642134  |
| H         | 5.19402326  | -1.16553554 | 2.14741991  |
| H         | 7.22519571  | -0.03340728 | -0.89981040 |
| H         | 7.30218359  | 1.67036717  | -0.41238303 |
| H         | 8.20665017  | 0.44044904  | 0.50077397  |
| H         | 1.34516087  | -4.43085358 | 0.79239472  |
| H         | -0.60337938 | -5.93528568 | 0.98913896  |
| H         | -2.86429938 | -5.09707174 | 0.31125459  |
| H         | -3.05328108 | -1.77930531 | 2.21166923  |
| H         | -4.80463872 | -0.63684105 | 3.49808719  |
| H         | -5.14270098 | 1.83548851  | 3.22229893  |
| H         | -3.70806206 | 3.09243980  | 1.66884097  |
| H         | 5.71700689  | -1.16043305 | -1.32142986 |
| H         | 5.90247246  | -3.39664026 | -2.32705547 |
| H         | 3.92489722  | -4.94497463 | -2.26405698 |
| H         | 1.84030469  | -4.21121784 | -1.22521518 |
| <b>3e</b> |             |             |             |
| C         | 2.34480625  | -3.43947484 | -0.51172373 |
| C         | 0.95156144  | -3.36322521 | -0.27527262 |
| C         | 0.37589137  | -2.07746993 | -0.11777336 |
| C         | 1.22295943  | -0.94406582 | 0.01630909  |
| C         | 2.63613178  | -1.10823227 | 0.04135046  |
| C         | 3.19917851  | -2.34451105 | -0.45481515 |

|   |             |             |             |
|---|-------------|-------------|-------------|
| C | 0.09766876  | -4.51214650 | -0.27065653 |
| C | -1.25644903 | -4.38234015 | -0.10109785 |
| C | -1.86122908 | -3.09062312 | 0.02213438  |
| C | -1.04109526 | -1.93653636 | -0.04258425 |
| C | -3.23514263 | -2.90863377 | 0.30777352  |
| C | -3.84813035 | -1.66507387 | 0.39746821  |
| C | -3.06224084 | -0.52338797 | -0.02324191 |
| C | -1.64577001 | -0.64928592 | -0.06097383 |
| C | -0.79728430 | 0.52447055  | -0.08397828 |
| C | 0.62733475  | 0.37271656  | 0.09548782  |
| C | -1.36769695 | 1.80726507  | -0.19063274 |
| C | -0.52974974 | 2.96809848  | 0.01769630  |
| C | 0.89572215  | 2.81456372  | 0.07901080  |
| C | 1.45243574  | 1.50060613  | 0.28245267  |
| C | -1.06813154 | 4.27244597  | 0.20982614  |
| C | -0.27017366 | 5.39980969  | 0.22544426  |
| C | 1.10475272  | 5.27255538  | -0.03168589 |
| C | 1.68560719  | 4.00809782  | -0.10653611 |
| C | 2.77034682  | 1.24970632  | 0.86281216  |
| C | -2.74682876 | 1.87896608  | -0.67095762 |
| C | 3.39060781  | 2.18540071  | 1.72858335  |
| C | 4.55352309  | 1.88751779  | 2.41784236  |
| C | 5.13033986  | 0.61386669  | 2.29120108  |
| C | 4.52902842  | -0.33101181 | 1.47678549  |
| C | 3.35978091  | -0.04512707 | 0.73179212  |
| C | -3.58531401 | 0.72260124  | -0.57583489 |
| C | -4.84136710 | 0.74636463  | -1.22950443 |
| C | -5.30194015 | 1.86123614  | -1.90861906 |
| C | -4.48589381 | 2.99985441  | -1.99635705 |
| C | -3.23263062 | 2.99306764  | -1.40665830 |
| C | 3.06242489  | 3.96492194  | -0.51758949 |
| N | 4.15337230  | 4.01226037  | -0.91405657 |
| C | 4.61744066  | -2.52585945 | -1.08880069 |
| C | 4.43079166  | -3.22833914 | -2.46379286 |
| C | 5.52221590  | -3.42830451 | -0.21919187 |
| C | 5.34242317  | -1.20062209 | -1.41206454 |
| C | -5.24421010 | -1.62619965 | 1.10525174  |
| C | -5.14697306 | -2.50189872 | 2.38785344  |
| C | -6.35875850 | -2.22569079 | 0.21746967  |
| C | -5.65919158 | -0.22753817 | 1.61384631  |
| H | 2.74088263  | -4.41472760 | -0.80128723 |
| H | 0.54758783  | -5.50143458 | -0.39074260 |
| H | -1.89642684 | -5.26797119 | -0.06238376 |
| H | -3.81233323 | -3.80812285 | 0.52976659  |

|   |             |             |             |
|---|-------------|-------------|-------------|
| H | -2.13994532 | 4.37963527  | 0.36834129  |
| H | -0.71057876 | 6.38616486  | 0.38607062  |
| H | 1.72952743  | 6.15550845  | -0.17839649 |
| H | 2.91203300  | 3.14680959  | 1.90897573  |
| H | 4.99221211  | 2.62946131  | 3.08911018  |
| H | 6.02245530  | 0.35124211  | 2.86506226  |
| H | 4.92775228  | -1.34293812 | 1.45700573  |
| H | -5.43412726 | -0.16465367 | -1.24921175 |
| H | -6.27059937 | 1.83248658  | -2.41358349 |
| H | -4.80951609 | 3.86972017  | -2.57322628 |
| H | -2.57880630 | 3.84475689  | -1.58092944 |
| H | 3.76106988  | -2.64733505 | -3.11668456 |
| H | 5.40596614  | -3.31499060 | -2.96847172 |
| H | 4.01954624  | -4.24367102 | -2.37683813 |
| H | 5.74564999  | -2.98213686 | 0.76117179  |
| H | 6.48428628  | -3.60502319 | -0.72747634 |
| H | 5.05531466  | -4.40894273 | -0.03680084 |
| H | 4.68779182  | -0.50864942 | -1.96399329 |
| H | 5.71505163  | -0.67096174 | -0.52973848 |
| H | 6.21235262  | -1.41610653 | -2.05222119 |
| H | -4.33742918 | -2.15121133 | 3.04660730  |
| H | -6.09305898 | -2.43937006 | 2.94847305  |
| H | -4.96875886 | -3.56396950 | 2.17090359  |
| H | -6.53739377 | -1.63863156 | -0.69546766 |
| H | -7.30921662 | -2.26545313 | 0.77453934  |
| H | -6.11151964 | -3.25227229 | -0.09527795 |
| H | -4.84876246 | 0.24182899  | 2.19303690  |
| H | -5.94824338 | 0.46884105  | 0.82028663  |
| H | -6.52700284 | -0.33491349 | 2.28348614  |

Table S3  $\beta_{\text{eff}}$  fitting results of (a) **3b** and (b) **3e**

| $\beta_{\text{eff}}$ | 20.7uj | 40.6uj | 60.5uj |
|----------------------|--------|--------|--------|
| <b>3b</b>            | 2.27   | 1.5    | 1.15   |
|                      | cm/GW  | cm/GW  | cm/GW  |
| <b>3e</b>            | 2.53   | 1.28   | 1.11   |
|                      | cm/GW  | cm/GW  | cm/GW  |

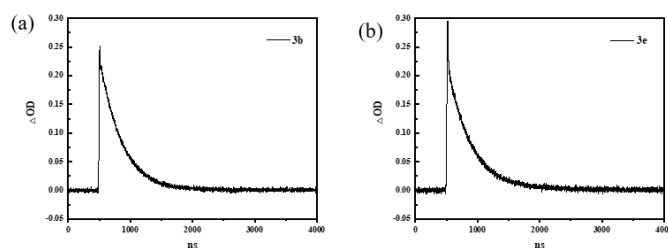

Figure S20 Decay trace of **3b** (a) and **3e** (b) at 480 nm.

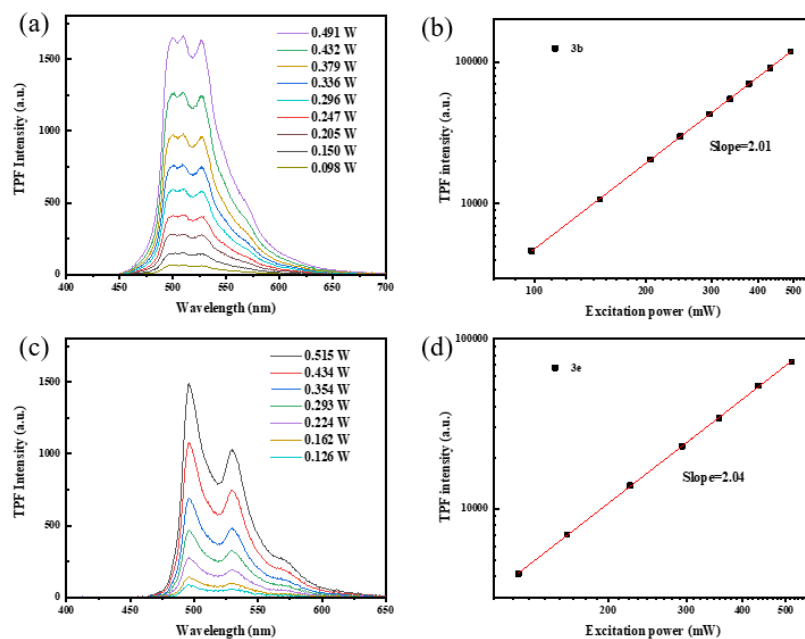

Figure S21 TPF intensity of **3b** (a) and **3e** (c). The linear fitting of power-dependent TPF intensity in logarithmic coordinates (b) and (d). The excitation wavelength is 800 nm.
